# Supplementary material
Source: publisher figshare collection journal article supplement (https://karger.figshare.com/ndownloader/files/24043175)
Supplement: Supplementary file 1 [file 24043175]

Additional file 2: Full search strategy for Pubmed database

| Database | Search string | Qualifiers / Filters | Results |
| --- | --- | --- | --- |
| Pubmed | (("blood donor" OR "blood service" OR "blood donation") AND (compliance OR non-compliance OR deferral OR "risk non-disclosure" OR "unreported deferrable risk" OR "risk behaviour" OR "risk behavior" OR inject* OR intravenous OR “people who inject drugs” OR "predonation assessment" OR “screening questions” OR “health history” OR “transfusion transmissible infection*”)) | humans  Publication date: to 16/07/2019 | 759 |
